# Supplementary material for: Hydrocarbon chain growth and hydrogenation on V(100): a density functional theory study
Source: Royal Society of Chemistry journal article supplement (doi:10.1039/c4ra15368e), 2014-12-10
Supplement: c4ra15368e1.pdf [file c4ra15368e1.pdf]

## Supporting Information

# Hydrocarbon Chain Growth and Hydrogenation on V(100): A Density Functional Theory Study

*Hui Wang,<sup>a</sup> Jing-Yao Liu,<sup>b</sup> Zhifang Chai,<sup>a,c</sup> and Dongqi Wang<sup>a\*</sup>*

<sup>a</sup>CAS Key Laboratory of Nuclear Radiation and Nuclear Energy Techniques, and Multidisciplinary Initiative Center, Institute of High Energy Physics, Chinese Academy of Sciences, Beijing 100049, China. E-mail: [dwang@ihep.ac.cn](mailto:dwang@ihep.ac.cn)

<sup>b</sup>Institute of Theoretical Chemistry, State Key Laboratory of Theoretical and Computational Chemistry, Jilin University, Changchun 130023, China

<sup>c</sup>School of Radiation Medicine and Interdisciplinary Sciences (RAD-X), Soochow University, Suzhou 215123, China

### **1. The AIMD simulations.**

In AIMD simulations of CH<sub>x</sub> adsorbed on V(100), an energy cutoff of 300 eV was used and the spin polarization was not considered. The AIMD simulations were performed more than 20 ps at three temperatures of 300, 500 and 800 K with a time step of 2 fs.<sup>1</sup> The smaller time step of 1 fs was also tested and gave similar results. The length of the simulation time in the present work may be not enough for strict statistical significance, but should be sufficient to capture the essential feature of the dominant processes.

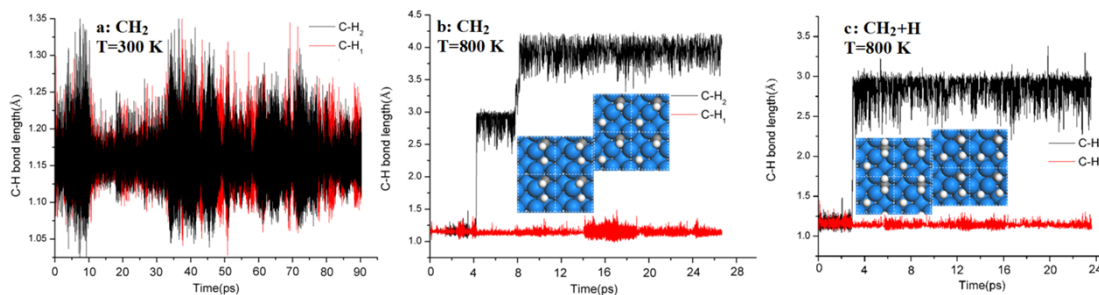

**Fig. S1** The C–H bond length (shortest one on the surface) as a function of simulation time during AIMD simulations of  $\text{CH}_2/\text{V}(100)$ .

## 2. The vibrational entropy

The vibrational entropy term at the harmonic approximation<sup>2</sup> for molecules on  $\text{V}(100)$  is obtained as follows:

$$S_{\text{vib}} = k_B \sum_{i=1}^s \left[ \ln \left( \frac{1}{1 - \exp\left(\frac{-h\nu_i}{k_B T}\right)} \right) + \frac{-h\nu_i}{kT} \times \frac{\exp\left(\frac{-h\nu_i}{k_B T}\right)}{1 - \exp\left(\frac{-h\nu_i}{k_B T}\right)} \right]$$

## 3. Microkinetic model

We applied the microkinetic modeling technique<sup>3-5</sup> to examine the hydrocarbon chain growth and hydrogenation on  $\text{V}(100)$ . Elementary steps included in the microkinetic model are summarized in Table 2 (see the main manuscript). Step **1 and 2** were assumed to be in equilibrium and the equilibrium constant  $K$  was estimated according to  $K = \exp[-(\Delta E_{\text{ads}} - T\Delta S)/k_B T]$ , in which  $\Delta E_{\text{ads}}$  is the minus adsorption energy of CO and  $\text{H}_2$  on  $\text{V}(100)$ , while  $\Delta S$  is the entropy change of them induced by adsorption. The other steps were described by the forward and/or reward rate. On the basis of our result, the dissociation of CH at high H coverage was inhibited and the dissociation of  $\text{CH}_2$  is not observed at low temperature, the reverse of reaction 4 was neglected and the reverse of reaction 5 was neglected at low temperature (300-500 K).

Rate constants for steps **3–16** were predicted using transition state theory (TST)<sup>6</sup>, e.g., rate constant for step N can be described as follows

$$k_N = A \exp(-E_{a,N} / k_B T)$$

where  $E_{a,N}$  is the activation barriers for the step N,  $T$  is temperature and  $A$  is the prefactor, respectively. The equilibrium constant  $K_N$  can be described as follows

$$K_N = \exp(-\Delta H_N / k_B T)$$

where  $\Delta H_N$  is the reaction energy for the step N. The coverage of CO and H are  $\theta_{CO} = p_{CO} K_1 \theta_*$  and  $\theta_H = (p_{H_2} K_2)^{1/2} \theta_*$ , respectively. Other surface species including C, CH, CH<sub>2</sub> and CH<sub>3</sub> can be described according to the steady-state approximation as summarized below, where the production and consumption rates of each species are assumed to be equal:

$$1. \frac{d\theta_C}{dt} = r_{3f} - r_{4f} = k_{3f} \theta_{CO} \theta_* - k_{4f} \theta_C \theta_H = 0 \quad (3)$$

$$2. \frac{d\theta_{CH}}{dt} = r_{4f} - r_{5f} = k_{4f} \theta_C \theta_H - k_{5f} \theta_{CH} \theta_H = 0 \quad (4)$$

$$3. \frac{d\theta_{CH_2}}{dt} = r_{5f} - r_{6f} + r_{6r} = k_{5f} \theta_{CH} \theta_H - k_{6f} \theta_{CH_2} \theta_H + k_{6r} \theta_{CH_3} \theta_* = 0 \quad (5)$$

$$4. \frac{d\theta_{CH_3}}{dt} = r_{6f} - r_{6r} + r_{7f} = k_{6f} \theta_{CH_2} \theta_H - k_{6r} \theta_{CH_3} \theta_* + k_{7f} \theta_{CH_3} \theta_H = 0 \quad (6)$$

From eq. 1 – 6, we can obtain surface coverages of C, CH, CH<sub>2</sub> and CH<sub>3</sub> as the function of  $\theta_*$ .

From the definition of the equilibrium constant  $K_N$ , we can obtain the coverage of C<sub>2</sub>H<sub>y</sub>. For example:

$$K_8 = \frac{\theta_{CC}\theta_*}{\theta_C\theta_C}$$

So  $\theta_{CC} = K_8\theta_C\theta_C/\theta_*$

**Table S1.** The coverage of species on V(100) at considered experimental condition ( $P_{CO} = 4$  atm,  $P_{H_2} = 8$  atm and T = 300-800 K).

| species                         | Coverage/ $\theta_*$ |          |          |                          |
|---------------------------------|----------------------|----------|----------|--------------------------|
|                                 | 300 K                | 500 K    | 800 K    | 800 K(including step 5r) |
| CO                              | 2.40E+45             | 3.57E+22 | 2.50E+09 | 2.50E+09                 |
| H                               | 2.88E+08             | 3.17E+03 | 3.71E+00 | 3.71E+00                 |
| CH <sub>3</sub>                 | 4.58E+48             | 1.25E+26 | 1.70E+13 | 1.70E+13                 |
| CH <sub>2</sub>                 | 1.51E+63             | 2.41E+36 | 1.90E+21 | 1.90E+21                 |
| CH                              | 6.55E+46             | 9.75E+24 | 3.46E+12 | 4.69E+24                 |
| C                               | 2.03E+45             | 1.21E+24 | 9.39E+11 | 9.39E+11                 |
| CC                              | 2.30E+63             | 1.04E+37 | 7.10E+21 | 7.10E+21                 |
| CCH                             | 1.97E+79             | 3.76E+46 | 6.70E+27 | 9.08E+39                 |
| CCH <sub>2</sub>                | 3.41E+102            | 1.24E+62 | 1.39E+39 | 1.39E+39                 |
| CCH <sub>3</sub>                | 2.75E+102            | 2.90E+60 | 3.20E+36 | 3.20E+36                 |
| CHCH                            | 1.30E+77             | 1.85E+45 | 1.02E+27 | 1.87E+51                 |
| CH <sub>2</sub> CH              | 1.58E+102            | 7.80E+61 | 1.04E+39 | 1.41E+51                 |
| CH <sub>3</sub> CH              | 1.74E+97             | 2.20E+57 | 3.59E+34 | 4.87E+46                 |
| CH <sub>2</sub> CH <sub>2</sub> | 1.41E+106            | 6.89E+65 | 1.27E+43 | 1.27E+43                 |
| CH <sub>2</sub> CH <sub>3</sub> | 3.67E+107            | 1.30E+65 | 1.07E+41 | 1.07E+41                 |

**Table S2.** The forward rate of C-C coupling steps at considered experimental condition ( $P_{CO} = 4$  atm,  $P_{H_2} = 8$  atm and T = 300-800 K).

| species                         | $r_f(s^{-1})/\theta_*^2$ |          |          |                          |
|---------------------------------|--------------------------|----------|----------|--------------------------|
|                                 | 300 K                    | 500 K    | 800 K    | 800 K(including step 5r) |
| CC                              | 2.14E+58                 | 9.92E+33 | 9.21E+19 | 2.10E+20                 |
| CCH                             | 1.76E+71                 | 5.56E+41 | 6.41E+24 | 9.21E+19                 |
| CCH <sub>2</sub>                | 2.79E+88                 | 4.37E+53 | 7.25E+33 | 8.70E+36                 |
| CCH <sub>3</sub>                | 2.28E+89                 | 4.10E+52 | 3.98E+31 | 7.25E+33                 |
| CHCH                            | 1.23E+73                 | 7.11E+42 | 3.15E+25 | 3.98E+31                 |
| CH <sub>2</sub> CH              | 8.88E+88                 | 8.76E+53 | 1.12E+34 | 5.80E+49                 |
| CH <sub>3</sub> CH              | 1.02E+87                 | 1.60E+51 | 5.24E+30 | 1.52E+46                 |
| CH <sub>2</sub> CH <sub>2</sub> | 8.05E+93                 | 3.11E+58 | 3.25E+38 | 7.10E+42                 |
| CH <sub>2</sub> CH <sub>3</sub> | 2.25E+100                | 6.10E+60 | 2.12E+38 | 3.25E+38                 |

### References:

- (1) Z.-H. Zeng, J. L. F. Da Silva, W.-X. Li, *Phy. Rev. B* 2010, **81**, 085408.

(2) Silbey, R. J.; Alberty, R. A. *Physical Chemistry*, 3rd ed., John Wiley & Sons, New York, **2002**, p. 593.

(3) Choi, Y.; Liu, P. *J. Am. Chem. Soc.* **2009**, *131*, 13054-13061.

(4) Liu, P. ; Rodriguez, J.A. *J. Chem. Phys.* **2007**, *126*, 164705-164712.

(5) Liu, P. ; Rodriguez, J.A. *J. Phys. Chem. B*, **2006**, *110*, 19418-19425.

(6) Laidler, K.J. *Chemical Kinetics*, 3rd ed.; Harper and Row: New York, 1987.
